# Supplementary material for: Ginkgo seed shell provides a unique model for bioinspired design
Source: PubMed Central journal article supplement — Proc Natl Acad Sci U S A. 2022 Nov 28;119(49):e2211458119. doi: 10.1073/pnas.2211458119 (PMC9897431; doi:10.1073/pnas.2211458119), 2022-11-28
Supplement: pnas.2211458119.sapp.pdf [file pnas.2211458119.sapp.pdf]

1  
2  
3  
4  
5  
6

## Supplementary Information for

7 Ginkgo seed shell provides a unique model for bioinspired design

8  
9 Yuanyuan Zhang<sup>1,4†</sup>, Jiajun Mao<sup>1†</sup>, Jingsong Peng<sup>1†</sup>, Antoni P. Tomsia<sup>1</sup>, Lei Jiang<sup>1,2</sup>, Qunfeng  
10 Cheng<sup>1,3\*</sup>

11 <sup>1</sup>School of Chemistry, Key Laboratory of Bio-inspired Smart Interfacial Science and Technology  
12 of Ministry of Education, Beihang University; Beijing 100191, P. R. China.

13 <sup>2</sup>Key Laboratory of Bio-inspired Materials and Interfacial Science, Technical Institute of Physics  
14 and Chemistry, Chinese Academy of Sciences; Beijing 100190, P. R. China.

15 <sup>3</sup>School of Materials Science and Engineering, Zhengzhou University, Zhengzhou 450001, P. R.  
16 China

17  
18 <sup>4</sup>School of Chemistry and Chemical Engineering, Inner Mongolia University, Hohhot 010021, P.  
19 R. China

20 †These authors contributed equally to this work.

21 \*Corresponding author: Qunfeng Cheng

22 Email: [cheng@buaa.edu.cn](mailto:cheng@buaa.edu.cn)

23  
24

### This PDF file includes:

25  
26  
27  
28  
29  
30  
31  
32

Supplementary text  
Figures S1 to S22  
Table S1  
Legends for Movies S1 to S2  
SI References

### Other supplementary materials for this manuscript include the following:

33  
34  
35  
36

Movies S1 to S2

37 **Supplementary Information Text**

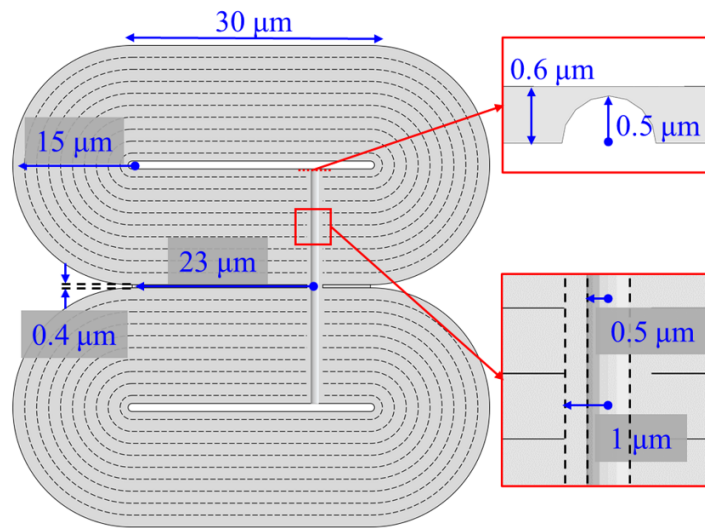

38

39 **Scheme S1.** The 2D finite element model of adjacent sclereids.

40

41 **Calculation of Young's modulus**

42 Nanoindentation tests can be performed in either load-controlled or displacement-controlled  
43 feedback mode. Here we used the load-controlled mode. A test is performed by applying a force to  
44 drive an indenter probe into the sample surface and then reducing the force to withdraw the probe.  
45 The applied load ( $P$ ) and indenter displacement ( $h$ ) into the sample are continuously monitored. A  
46 load vs. displacement curve can then be generated from the collected data. Scheme S2 depicts an  
47 example of a load vs. displacement curve in which the load is increased at a constant rate to some  
48 peak value (loading), held at that value for a set amount of time, and then decreased to zero  
49 (unloading). The sample hardness ( $H$ ) and reduced elastic modulus ( $E_r$ ) can then be calculated  
50 from the curve.

51

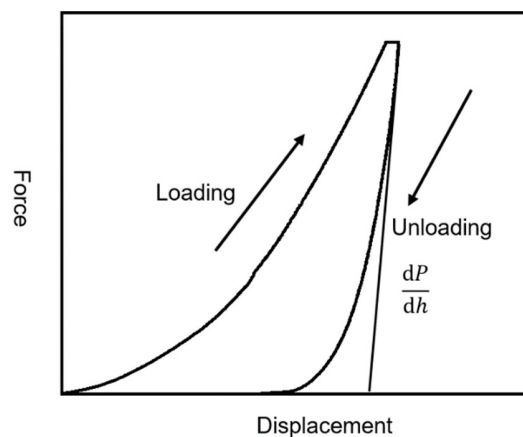

52

53 **Scheme S2.** Example of a force versus displacement curve from an indentation test on ginkgo  
54 seed shell.

55

56 Reduced modulus is calculated from nanoindentation. The reduced modulus is defined by the  
57 equation

$$58 \quad E_r = \frac{S\sqrt{\pi}}{2\sqrt{A}} \quad (1)$$

59 where  $S$ , the unloading stiffness, is defined by

$$60 \quad S = \frac{dP}{dh} \quad (2)$$

61 and  $A$  is the projected contact area.

62 The reduced modulus is related to the modulus of elasticity ( $E_s$ ) through the equation

$$63 \quad \frac{1}{E_r} = \frac{(1-\nu_i^2)}{E_i} + \frac{(1-\nu_s^2)}{E_s} \quad (3)$$

64 Where the subscript  $i$  corresponds to the indenter material, the subscript  $s$  refers to the  
65 indented sample material, and  $\nu$  is Poisson's ratio. For a diamond indenter probe,  $E_i$  is 1140 GPa  
66 and  $\nu_i$  is 0.07. Poisson's ratio varies between 0 and 0.5 for most materials (the Poisson's ratio we  
67 used here is 0.3).

68 The unloading stiffness ( $S$ ) is calculated by fitting the unloading curve to the power law relation

$$69 \quad P = A(h - h_f)^m \quad (4)$$

70 where  $A$ ,  $h_f$ , and  $m$  are arbitrary fitting parameters. The stiffness at the peak of the unloading  
71 curve represents the elastic response of the material at the initial point of unloading, which can be  
72 calculated from the derivative of equation 4, evaluated at  $h = h_{\max}$ .

$$73 \quad S = \left. \frac{dP}{dh} \right|_{h=h_{\max}} = mA(h_{\max} - h_f)^{m-1} \quad (5)$$

74 The hardness is defined by the ratio of the maximum load to the projected contact area, or

$$75 \quad H = \frac{P_{\max}}{A} \quad (6)$$

76 The contact area,  $A$ , is a function of the probe's contact depth,  $h_c$ . The area function  $A(h_c)$  is  
77 unique for each probe and is determined through a calibration on a reference material. The contact  
78 depth is calculated from the load vs. displacement curve as

$$79 \quad h_c = h_{\max} - \varepsilon \frac{P_{\max}}{S} \quad (7)$$

80 Equation 7 accounts for the fact that the contact depth is always less than the peak  
81 displacement due to the deflection of the surface around the contact perimeter.  $\varepsilon$  is a geometric  
82 constant taken to be 0.75 for most common probe geometries. The average modulus was obtained  
83 from seven ginkgo samples.

84  
85 The fracture toughness and the crack extension resistance curve (R-curve) were determined  
86 to evaluate the toughening behavior of the natural seed shell. Three-point bend tests were  
87 performed to generate stress-strain information with a support span of 3.5 mm on the Gatan  
88 Microtest 2 kN three-point bend stage at a displacement rate of 0.033 mm/min. The plane-strain  
89 fracture toughness,  $K_{IC}$ , and R-curve measurements were performed on the single-edge notched  
90 beam.

91 The converted stress intensity factor  $K_{JC}$  is determined in terms of

$$92 \quad K_{JC} = \sqrt{(J_{el} + J_{pl}) \times E'} \quad (8)$$

93 where  $J_{el}$  is the elastic component of  $J$ -integral,  $J_{pl}$  the plastic component, and  $E'$  is calculated  
94 from

95 
$$E' = \frac{E}{1-\nu^2}$$
 (9)

96 for plane-strain conditions, where  $E$  is the elastic modulus and  $\nu$  Poisson's ratio.  
 97 The calculation of  $J_{el}$  is given by

98 
$$J_{el} = \frac{K_{IC}^2}{E'}$$
 (10)

99 where  $K_{IC}$  is the plane-strain fracture toughness at or near the onset of crack initiation.  $K_{IC}$  is  
 100 based on the relation

101 
$$K_{IC} = \frac{PS}{4BW^{\frac{3}{2}}} f\left(\frac{a}{W}\right)$$
 (11)

102 
$$f\left(\frac{a}{W}\right) = \left(7.31 + 0.21\sqrt{\frac{S}{W} - 2.9}\right) \sec\left(\frac{\pi a}{2W}\right) \sqrt{\tan\left(\frac{\pi a}{2W}\right)}$$
 (12)

103 where  $P$  is the applied load,  $S$  the support span,  $B$  the width of the specimen,  $W$  the thickness,  
 104 and  $a$  the initial crack length. The initial crack length  $a$  is equal to the depth of the notch for tested  
 105 specimens.

106 The plastic component  $J_{pl}$  is given in terms of

107 
$$J_{pl} = \frac{2A_{pl}}{B(W-a)}$$
 (13)

108 where  $A_{pl}$  is the area of the plastic region under the load-displacement curve.

109 The crack length was measured by acquiring a movie of the in-situ three-point bend test of  
 110 the samples. The real-time measurements permitted evaluation of the load-displacement curve.

111

### 112 **Calculation of fibril angle**

113 Samples for TEM were dehydrated in mixture of ethanol and acetone and then embedded in  
 114 araldite. An ultramicrotome (Leica EM UC7) with a diamond knife was used to obtain ultrathin  
 115 sections. The sectioned ginkgo seed shell samples were pictured with a Bruker MultiMode 8-HR  
 116 both in ScanAsyst mode and tapping mode. The silicon probe (OTESPA-R3) used in the test has  
 117 a nominal spring constant of 26 N/m and approximate tip apex diameter of 7 nm. Calibration has  
 118 been implemented via Sader method before each experiment. Nanoindentation experiments were  
 119 measured with the same probe under ScanAsyst mode.

120 The indentation modulus,  $M$ , is obtained from the slope of the unloading curve. The  $S$  based  
 121 on the reported by Vlassak et al. can be characterized by

122 
$$S = dF / dU = \frac{2}{\sqrt{\pi}} M \sqrt{A_c}$$
 (14)

123 where  $F$  is the load,  $U$  is the vertical movement of the probe, and  $A_c$  is the projected contact  
 124 area. Swadener and Pharr showed that the calculation of the contact area  $A_c$  is written as

125 
$$A_c = 2\pi R U_c$$
 (15)

126 where  $R$  is the radius of the probe, and  $U_c$  is the average contact depth. The value of  $U_c$  can  
 127 be analyzed from the Oliver–Pharr method and is given by

128 
$$U_c = U_{\max} - \varepsilon \frac{F_{\max}}{S}$$
 (16)

129 Next, we characterized the material properties on account of the measured indentation  
 130 modulus. The microfibril is regarded as a transversely isotropic object with stiffness tensor  $C_{ijkl}$   
 131 and has definition in a Cartesian coordinate system  $(x_1, x_2, x_3)$ , where  $x_1$  is defined along the axial  
 132 direction of the microfibrils, while  $x_2$  and  $x_3$  lie in the direction perpendicular to microfibrils (Scheme  
 133 S3). Especially,  $x_3$  lies in the plane of the transverse section independent of the microfibril angle.

134 The unit normal vector is defined as  $n$  in the direction parallel to the axis of the sclereid cell. To  
 135 estimate relation of the microfibers and indentation modulus, the method proposed by Vlassak et  
 136 al. is employed. The indentation modulus is determined in two steps:

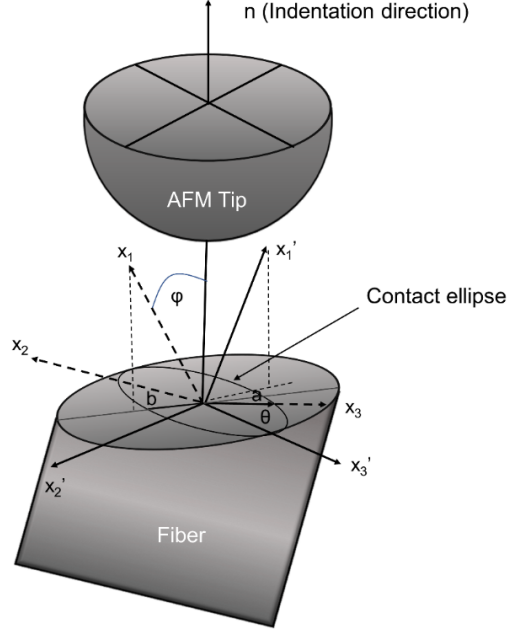

137

138 **Scheme S3.** Conical indentation in fibers and right-hand coordinate system used for the contact  
 139 mechanics analysis.

140

141 The first step is according to the surface Green's function proposed by Barnett and Lothe.  
 142 Upon the unit normal vector parallel to the axis, the displacement of a point  $P$  at a position  $r$  on the  
 143 surface is written as

$$w(y) = \frac{1}{8\pi^2|y|} \left[ n_k B_{km}^{-1} \left( \frac{y}{|y|} \right) nm \right] = \frac{h(\theta)}{r} \quad (17)$$

144

145 where  $y$  is the position vector of from  $P$  to  $Q$ , the unit vector is composed of  $n_k$ , and  $h$  and  $r$   
 146 are the polar coordinates of  $P$  in a coordinate system centered on  $Q$ .  $h(\theta)$  is part of the surface  
 147 Green's function not dependent on the angle.  $B$  is a second-order tensor; its components are given  
 148 by

$$B_{js}(x'_3) = B_{sj}(x'_3) = \frac{1}{8\pi^2} \int_0^{2\pi} \left[ (x'_1 x'_1)_{js} - (x'_1 x'_2)_{jk} (x'_2 x'_2)_{kr} (x'_2 x'_1)_{rs} \right] d\varphi \quad (18)$$

149

150 where  $x'_3$  is the normalized form of  $y$ .  $x'_1$ ;  $x'_2$ ;  $x'_3$  form a right-hand coordinate system, and  $\varphi$   
 151 is the angle between vector  $x'_1$  and the surface.

152

153 Barber's theory is used in the second step to establish the connection between load  $F$  and  
 154 penetration  $U$ . The integral of conical tip shapes is flat punch pressure distribution carrying on the  
 155 elliptical contact area, this integral for conical tip shapes is determined by major axis  $a$  and minor  
 156 axis  $b$ , and the relation between force  $F$  and penetration  $U$  is given by

$$F(e, \Phi) = \frac{U^2}{\cot \gamma \alpha(e, \Phi) E(e)} \quad (19)$$

157

158 where  $\gamma$  is the cone angle and  $e = \sqrt{1 - (b^2/a^2)}$  is the eccentricity of the contact ellipse. The  
 159 angle between major axis of the ellipse and the h for reference direction is  $\Phi$ , and  $E(e)$  is the entire  
 160 elliptic integral.  $a$  is obtained as

$$\alpha(e, \Phi) = \int_0^\pi \frac{h(\theta + \Phi)}{\sqrt{1 - e^2 \cos^2 \theta}} d\theta \quad (20)$$

161 The indentation modulus according to Barber's theory is then given as the derivative of  $F$  with  
 162 respect to  $U$ , writing as

$$S = \frac{dF}{dU} = \frac{2}{\sqrt{\pi}} \sqrt{Ac} \frac{1}{\alpha(e, \Phi)(1 - e^2)^{1/4}} \quad (21)$$

164 So the indentation modulus of a cone in an anisotropic half space is reading as

$$M = \frac{1}{\alpha(e, \Phi)(1 - e^2)^{1/4}} \quad (22)$$

166 The relation between the indentation modulus, indentation direction, and stiff properties of the  
 167 transversely isotropic cell wall materials is given by the final equation.

168 In order to eliminate the difference between theoretical parameters and measured value, we  
 169 used the relative indentation modulus

$$R_M = \frac{M - M_{\min}}{M_{\max} - M_{\min}} \quad (23)$$

171 where  $M_{\min}$  represents the minimum indentation modulus within a cycle when the angle is  
 172 equal to 0 degree and  $M_{\max}$  represents the maximum value when the angle is equal to 90 degrees.  
 173

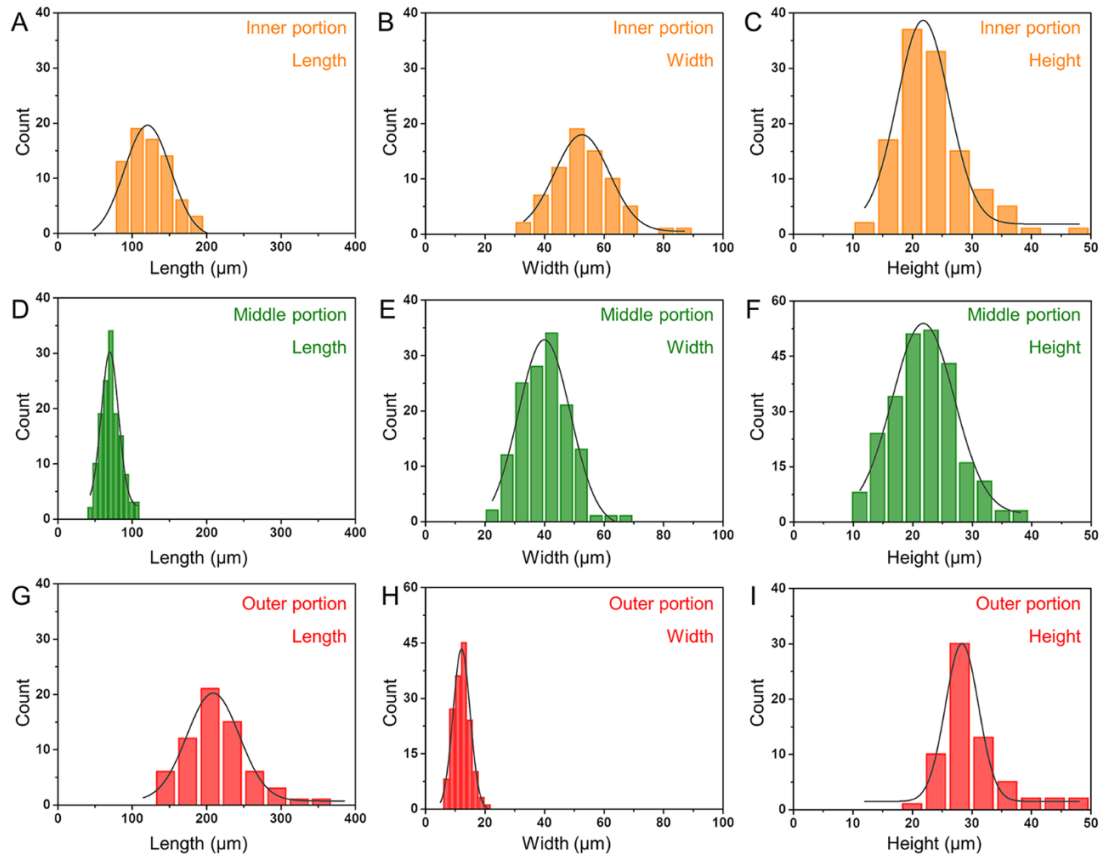

174

175 **Fig. S1. The statistical data of the size of the sclereid from the outer surface to the inner**  
 176 **surface along the *R* direction.**

177 The orange graphs show the length ( $124.9 \pm 27.6 \mu\text{m}$ ) (A), width ( $53.2 \pm 9.9 \mu\text{m}$ ) (B), and height  
 178 ( $23.4 \pm 6.1 \mu\text{m}$ ) (C) of the sclereid in the inner portion. The green graphs show the length ( $71.2 \pm$   
 179  $13.23 \mu\text{m}$ ) (D), width ( $40.2 \pm 8.0 \mu\text{m}$ ) (E), and height ( $22.0 \pm 5.6 \mu\text{m}$ ) (F) of the sclereid in the middle  
 180 portion. The red graphs show the length ( $214.2 \pm 43.6 \mu\text{m}$ ) (G), width ( $12.2 \pm 2.8 \mu\text{m}$ ) (H), and  
 181 height ( $30.2 \pm 5.7 \mu\text{m}$ ) (I) of the sclereid in the outer portion. The average aspect ratio of the three  
 182 portions is 5.3, 3.2, and 17.6 of the inner portion, middle portion, and the outer portion, respectively.  
 183 The outer portion accounts for only 9% of the thickness of the whole seed shell. We therefore  
 184 focused mainly on the inner and middle portions of the seed shell and considered the seed shell a  
 185 weakly anisotropic material with a low aspect ratio of only 3.2–5.3.  
 186

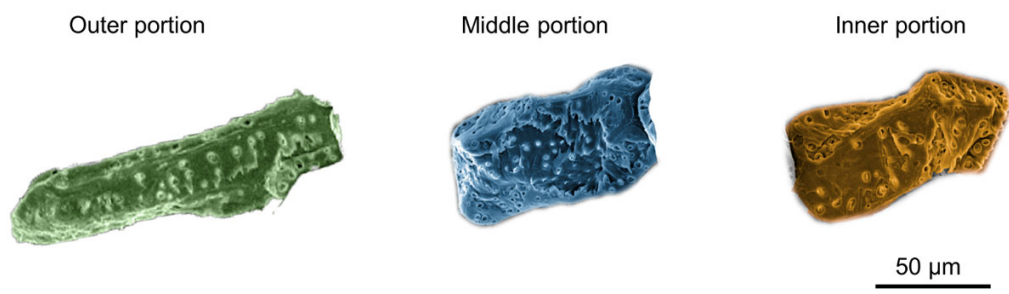

187

188 **Fig. S2. Cell types on the basis of X-ray micro-tomography and SEM images.**

189 The outer portion of ginkgo seed shells is composed mainly of elongated sclereids. In the middle  
190 and inner portion, more equiaxed sclereids make up the majority of the shell.



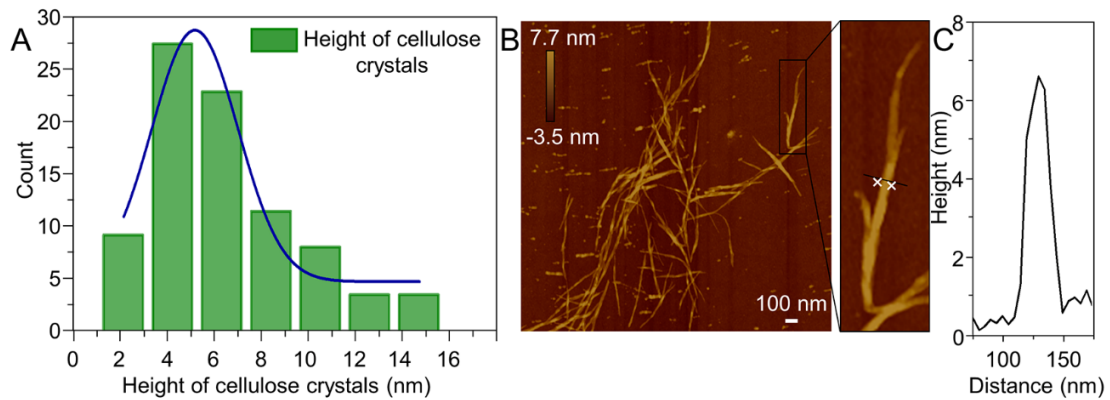

191

192 **Fig. S3. The statistical data of the height of cellulose crystals.**

193 The cellulose crystals were obtained from delignified ginkgo seed shell. The delignified seed shell  
 194 was exfoliated by H<sub>2</sub>SO<sub>4</sub> solution to generate the cellulose crystals. **(A)** The number-average height  
 195 of cellulose crystals is deduced as 5–7 nm. **(B)** The height image of cellulose crystals. **(C)** Cross-  
 196 sectional profiles obtained from AFM images.  
 197

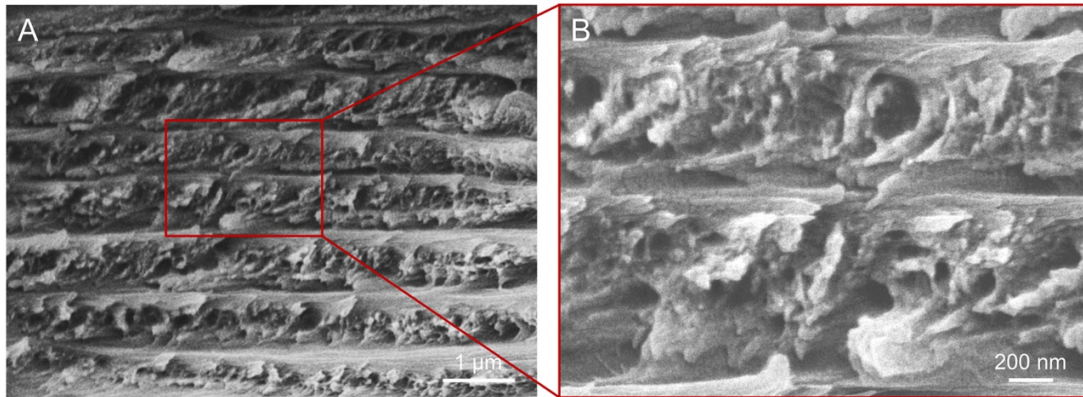

198

199 **Fig. S4. SEM images of cell walls.**

200 SEM images of the cell wall in a sclereid (A) and morphology of a sclereid with higher magnification  
201 in a manner of helicoidal arrangement (B). To make up the helicoidal cell wall, the cellulose  
202 microfibrils are aligned parallel into a layer, and these layers are further stacked and rotated around  
203 the normal direction. The cross section of the cell wall shows different angles between the cellulose  
204 microfibrils due to gradually varied orientation of cellulose microfibrils at different layers.  
205

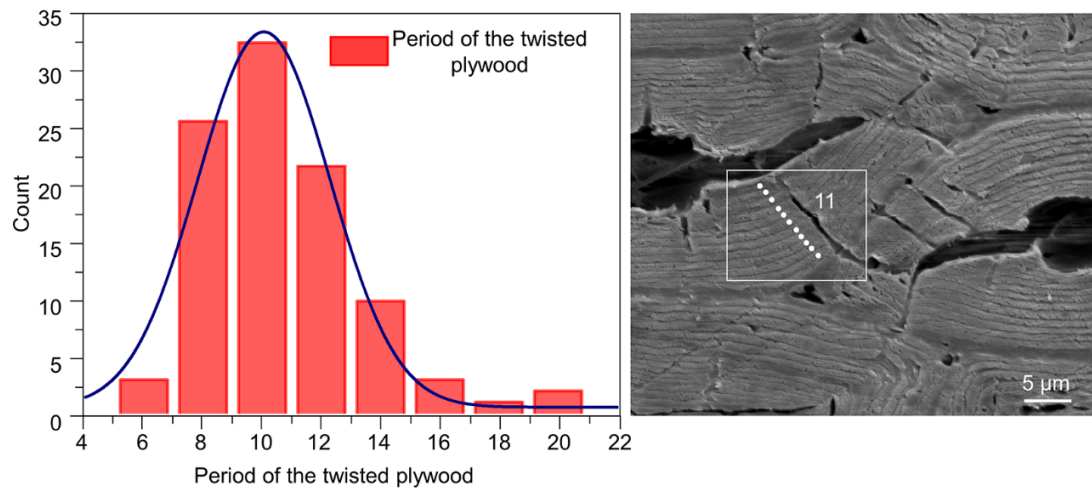

206

207 **Fig. S5. The statistical data of the period of the helicoidal layers.**

208 The number-average period of the helicoidal layers is deduced as 8 to 12. The corresponding SEM

209 image shows a region of cell wall with a period of 11.

210

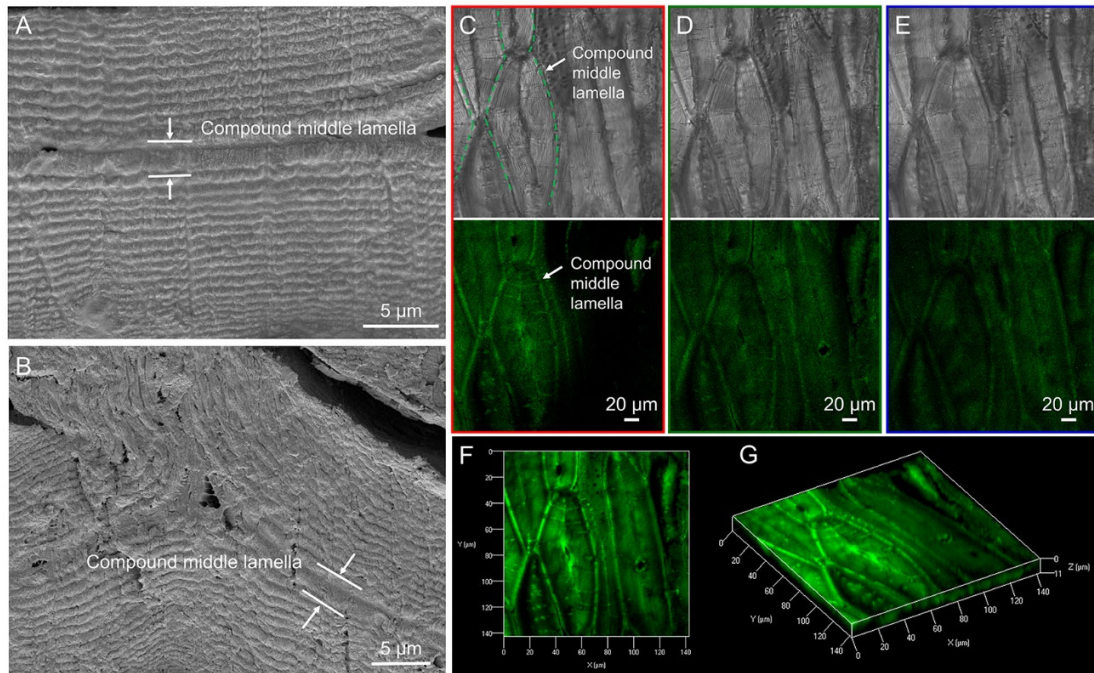

211

212 **Fig. S6. SEM images of the CML.**

213 (A, B) The compound middle lamella shows a thickness of several micrometers. The confocal  
 214 microscopy images under bright field and corresponding fluorescent images (C, D, and E). (C, D)  
 215 and (E) show a single optical section and (F) is the maximum projection. (G) The 3D reconstruction  
 216 image of the cross section of ginkgo seed shell. This compound middle lamella includes the middle  
 217 lamella, the primary cell wall, and some outer portions of the secondary cell wall. The lignin content  
 218 of the compound middle lamella and the pits is much higher than that of the inner cell wall. The  
 219 high content of lignin in the compound middle lamella and the pits is illustrated by the higher  
 220 fluorescent intensity on the confocal images.  
 221

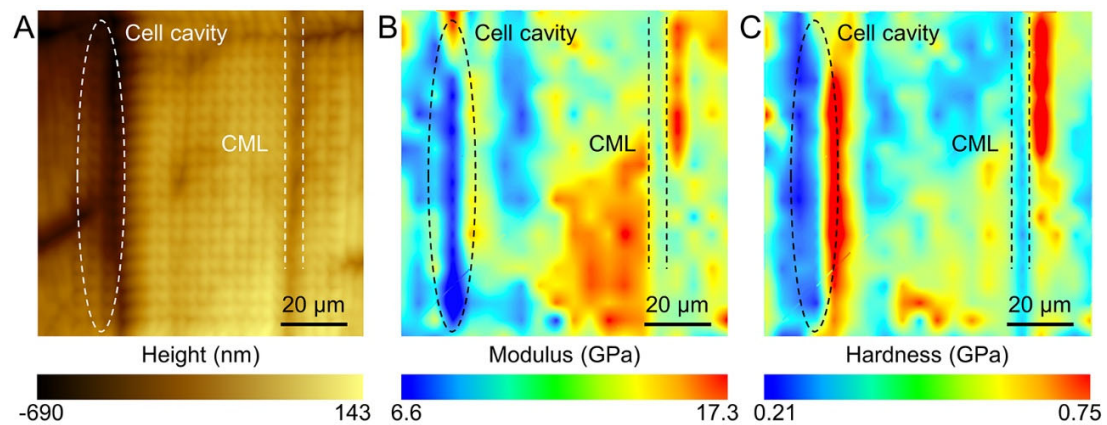

222

223 **Fig. S7. Indentation modulus and hardness of the cell unit.**

224 (A) AFM height images of the cell unit. AFM heat maps of the internal mechanical properties of the  
 225 cell unit; (B) and (C) are indentation modulus and hardness, respectively.

226

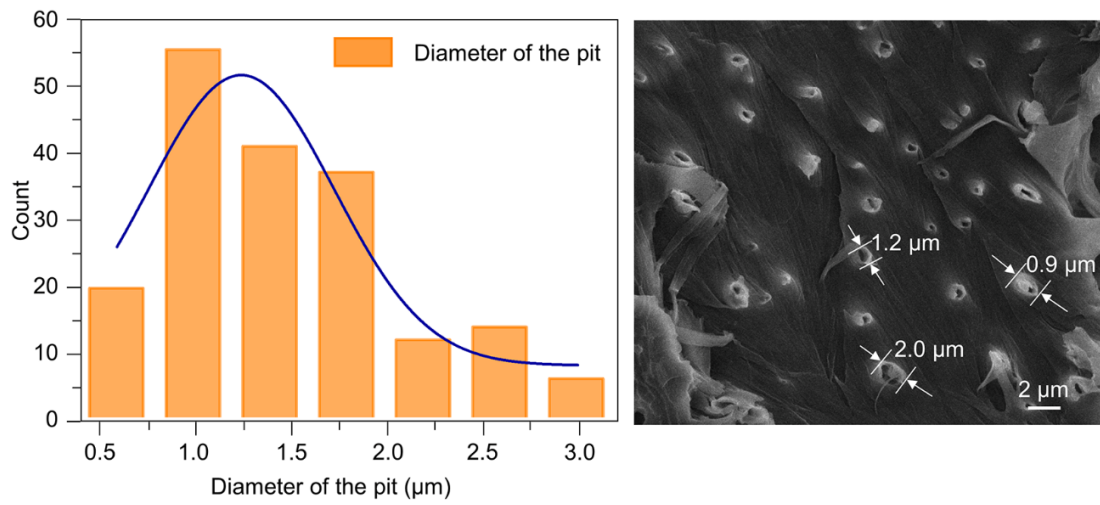

227

228 **Fig. S8. The statistical data of the diameter of the pit structure.**

229 The number-average diameter of the pit is deduced as 1.2 μm. The SEM image of the surface from  
 230 a sclereid with fractured pits shows how the diameter of corresponding pits is measured.  
 231

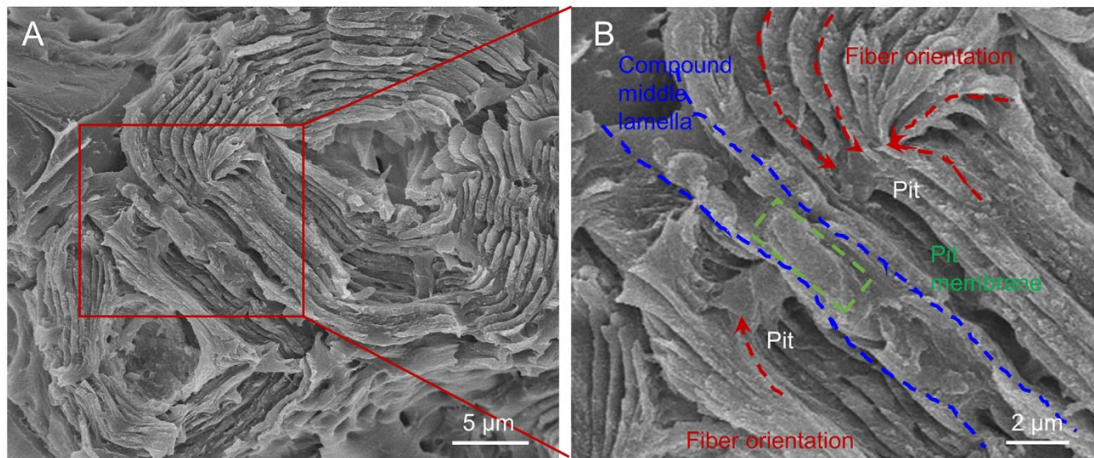

232

233 **Fig. S9. SEM images of the compound middle lamella of two adjacent sclereids cutting along**  
 234 **the R direction.**

235 (A-B) The detailed morphology of the pit pair at the compound middle lamella. The dashed red  
 236 arrows illustrate the orientation of these cellulose microfibrils. The dashed green areas and blue  
 237 areas are the pit membrane and CML, respectively. In the junction of a pit pair, the microfibrils are  
 238 oriented together to form a membrane, bonding strongly the two pits from adjacent sclereids.  
 239

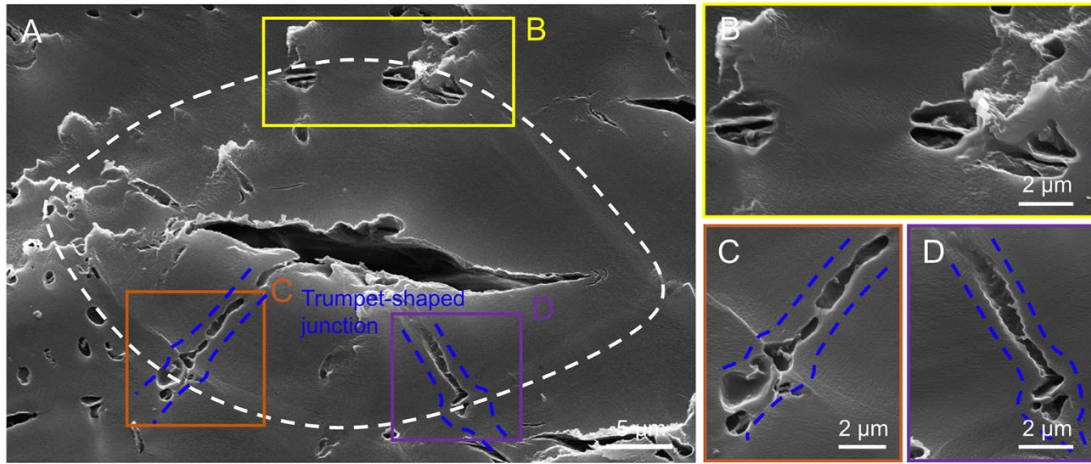

240

241 **Fig. S10. SEM image of the cross section of a polished sclereid.**

242 (A) SEM image of the cross section of a sclereid polished by ion beam milling cutting along the R  
 243 direction. (B–D) SEM images with higher magnification of different positions at the CML between  
 244 two sclereids showing the pit pair structure. The dashed white area is the sclereid and the dashed  
 245 blue lines are trumpet-shaped junctions. The pit pair structure at the CML shows a symmetrical  
 246 trumpet-shaped junction with a pit membrane.  
 247



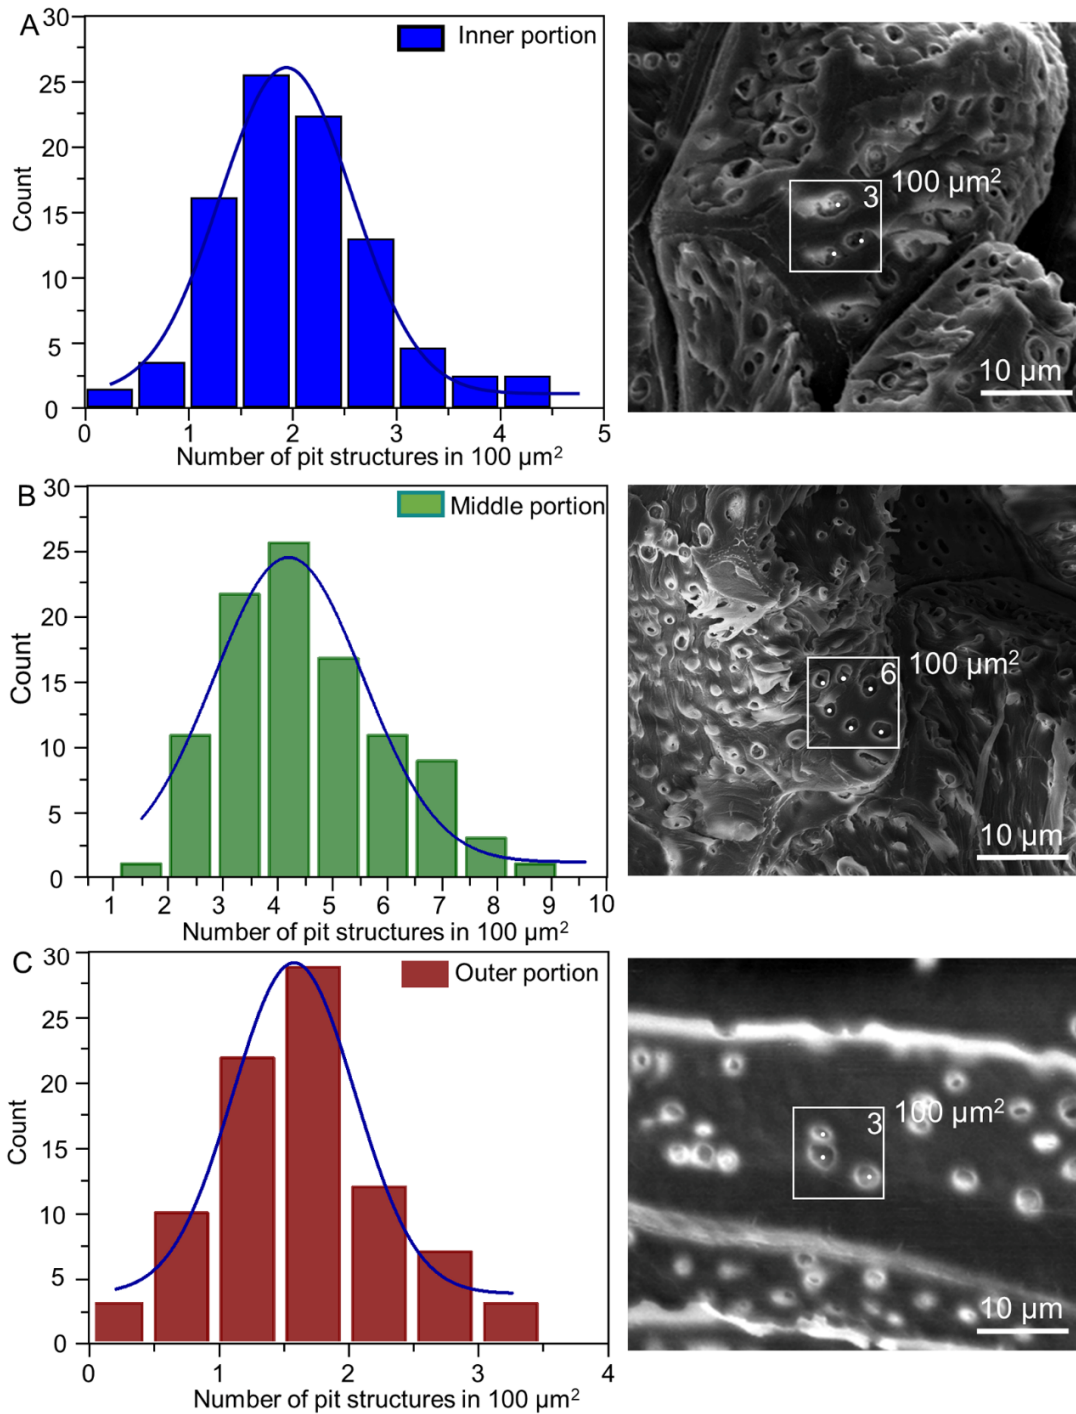

248

249 **Fig. S11. The statistical data of the pit structure.**

250 The average number of pit structures in 100  $\mu\text{m}^2$  of in the inner portion (A), the middle portion (B)  
 251 and the outer portion (C) is 1-3, 3-5, and 1-3, respectively. The SEM image shows a corresponding  
 252 region with an area of 100  $\mu\text{m}^2$  and the pits in this region, which are illustrated by white dots.  
 253

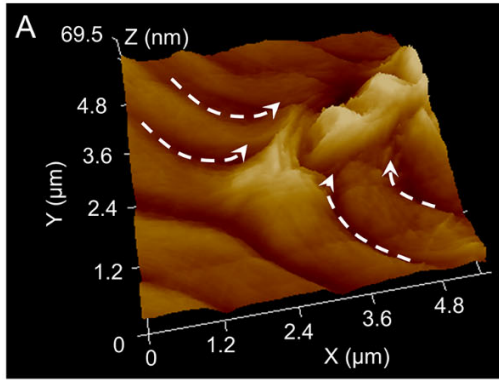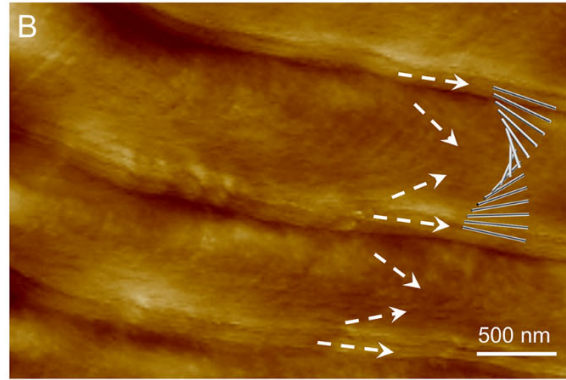

254

255 **Fig. S12. AFM images of the alignment of the cell walls.**

256 AFM images of the alignment of the cell walls around a pit (A) and the cell wall with the helicoidal  
 257 pattern (B).  
 258

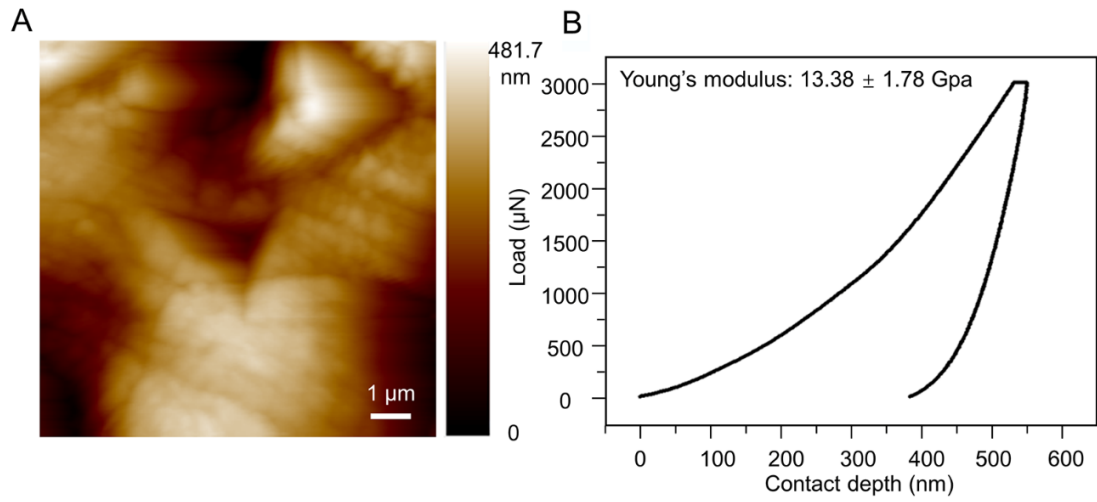

259

260 **Fig. S13. Nanoindentation test of the ginkgo seed shell.**

261 (A) AFM image of the cross section of ginkgo seed shell after a nanoindentation test. The  
 262 indentation made by the diamond Berkovich tip can be clearly observed. (B) The corresponding  
 263 nanoindentation loading-unloading curve. The modulus was calculated from the loading-unloading  
 264 curve with an average value of  $13.38 \pm 1.78$  GPa.  
 265

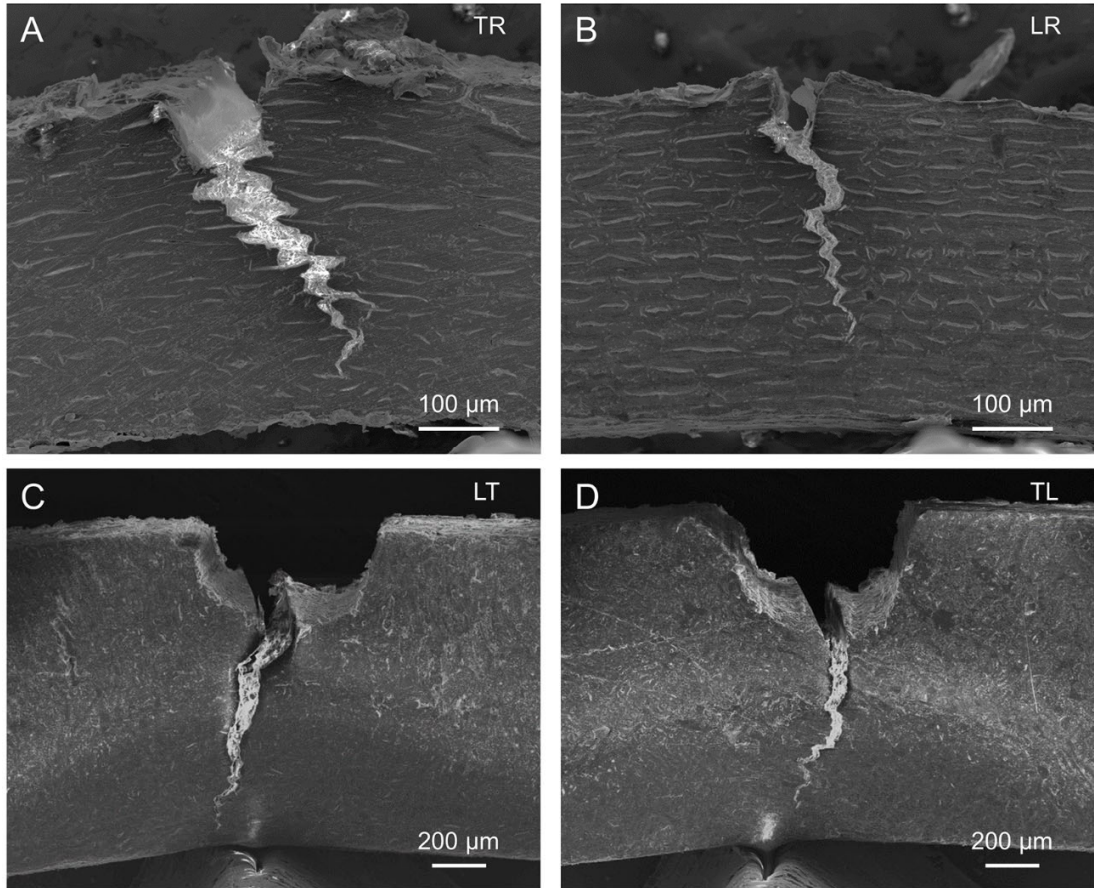

266

267 **Fig. S14. The crack paths for the four propagation directions.**

268 The crack paths for the four propagation directions: TR (A), LR (B), LT (C), and TL (D). The fracture  
269 cracks in these four directions all exhibit complex toughening mechanisms, such as crack deflection  
270 and branching. The crack propagation for TR shows a more efficient crack resistance with more  
271 “zig-zag” crack wake.  
272

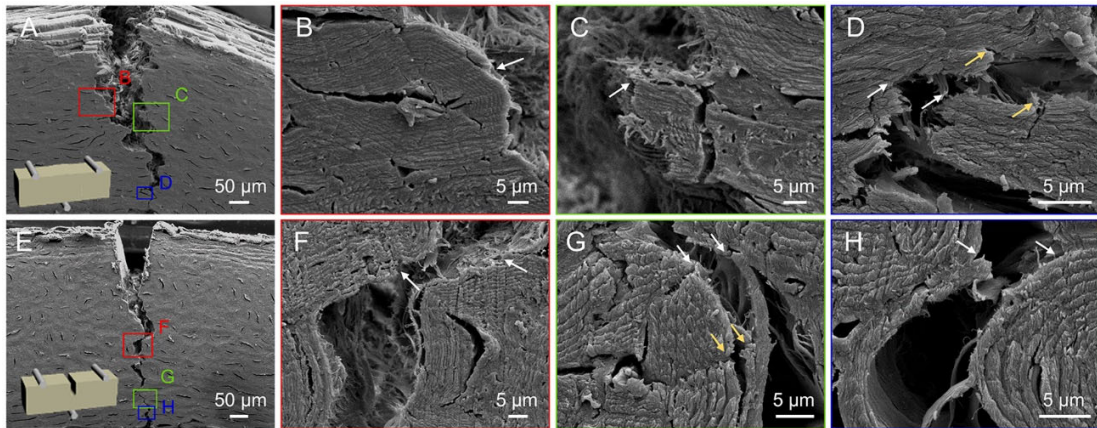

273

274 **Fig. S15. In-situ SEM images of the crack propagation.**

275 In-situ SEM images of the crack propagation of an unnotched sample (A) and a single-edge  
 276 notched sample (E) of the ginkgo seed shell after three-point bend testing. Detailed morphologies  
 277 (B, C, D) for the unnotched sample and (F, G, H) for the notched sample. The unnotched sample  
 278 shows the cleavage (B) and breakage (C, D) of the sclereids. The crack can be terminated by the  
 279 cell cavity and deflected along other directions (D). The white arrows (in B, C, D) illustrate the pits,  
 280 which act as the entrances to guide the crack into the sclereid. Compared with the notched sample  
 281 (F–H), the crack propagation shows no significant distinction. Arrows of the same color indicate the  
 282 same pair of pits that has been broken.  
 283

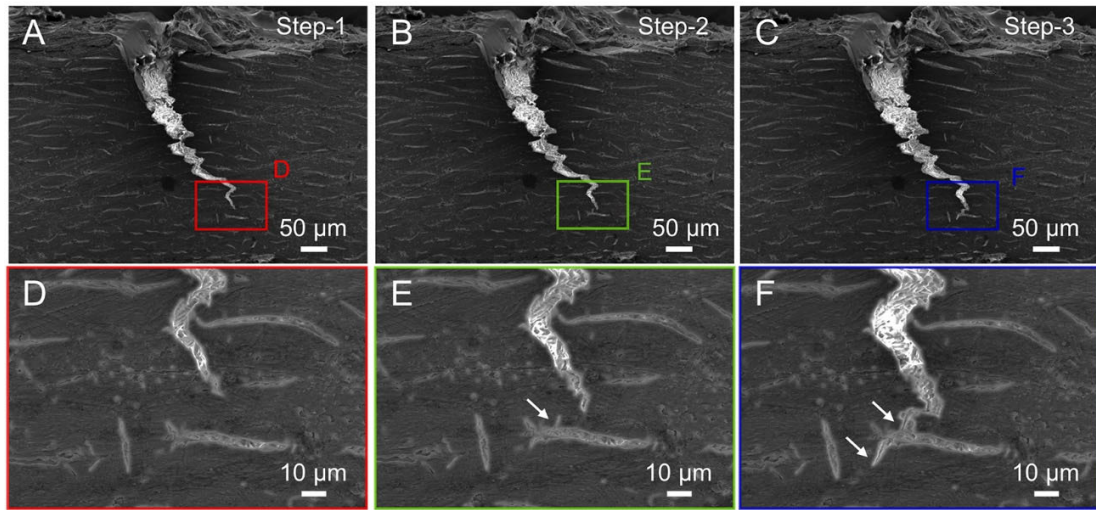

284

285 **Fig. S16. SEM images of the crack propagation at the single-edge notched sample.**

286 In-situ SEM images of the crack propagation at the single-edge notched sample of ginkgo seed  
287 shell (A–C) with corresponding high-magnification images (D–F), showing the clear initiation of the  
288 crack propagating into the sclereid through the pit structure. The pit structure within the sclereid  
289 is identified by the white arrow.  
290

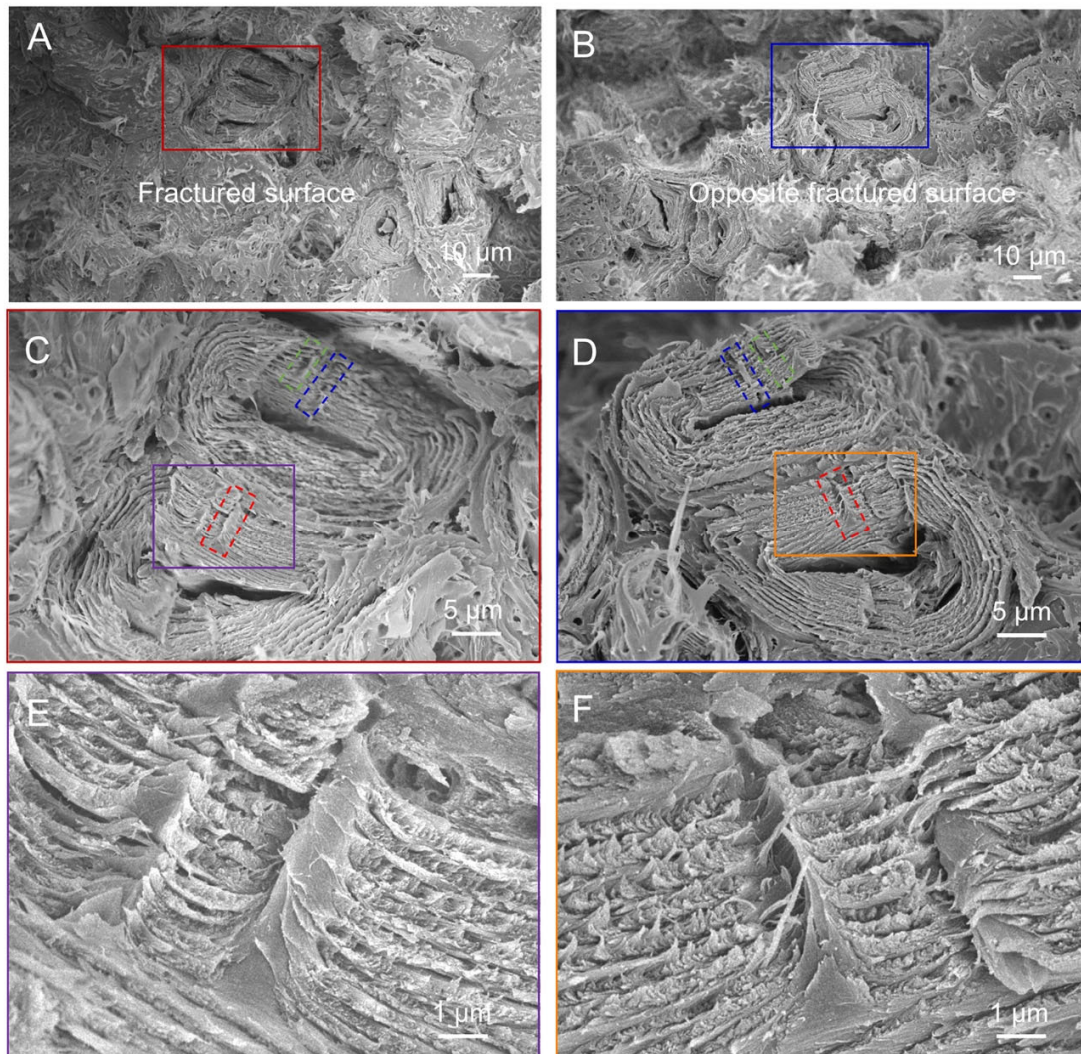

291

292 **Fig. S17. SEM images of two separated sclereids showing the “stretched pits” in dry state.**

293 SEM images of the fractured surface (A) and the opposite fractured surface (B) from a sample in  
 294 dry state. SEM images of pits guiding the fracture through the cells (C) and through broken cells  
 295 left behind on the opposite fracture surface (D). (E and F) The “pulled-out” pits on the surface of a  
 296 fractured cell and left “hole”. The dashed red, blue and green areas in (c and d) are pits divided  
 297 into two parts.

298

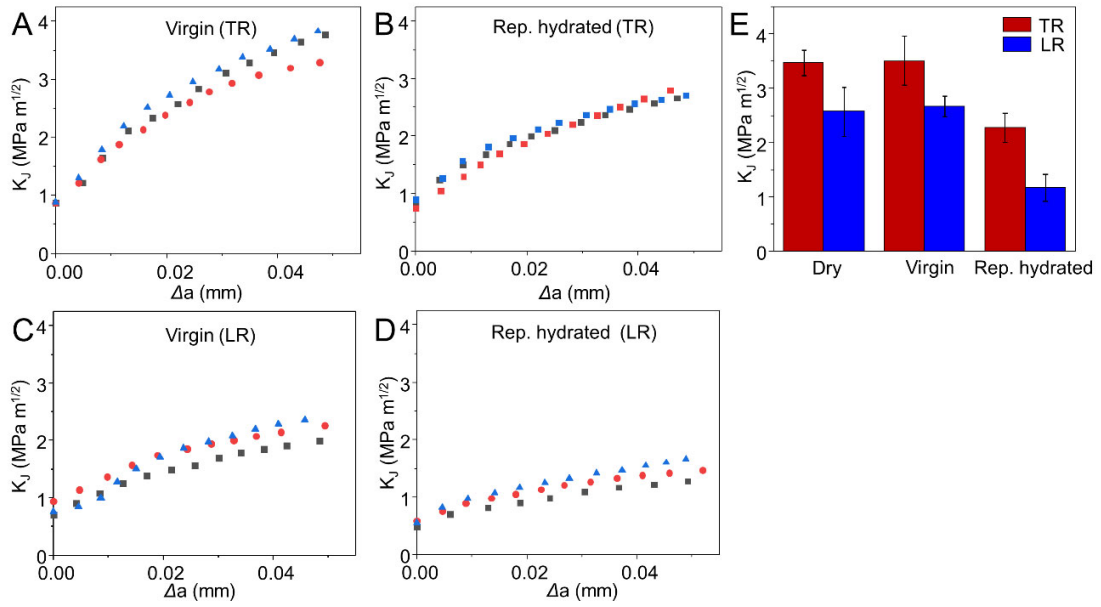

299

300 **Fig. S18. The rising resistance R-curves for the cracks in different hydrated states.**  
 301 The rising resistance R-curves for the cracks in virgin state TR direction (A), repeatedly hydrated  
 302 (Rep. hydrated) state TR direction (B), virgin state LR direction (C), and Rep. hydrated LR direction  
 303 (D). (E) The  $K_{Ic}$  for the two crack orientations with different moisture content ( $\Delta a \approx 0.05$  mm).  
 304



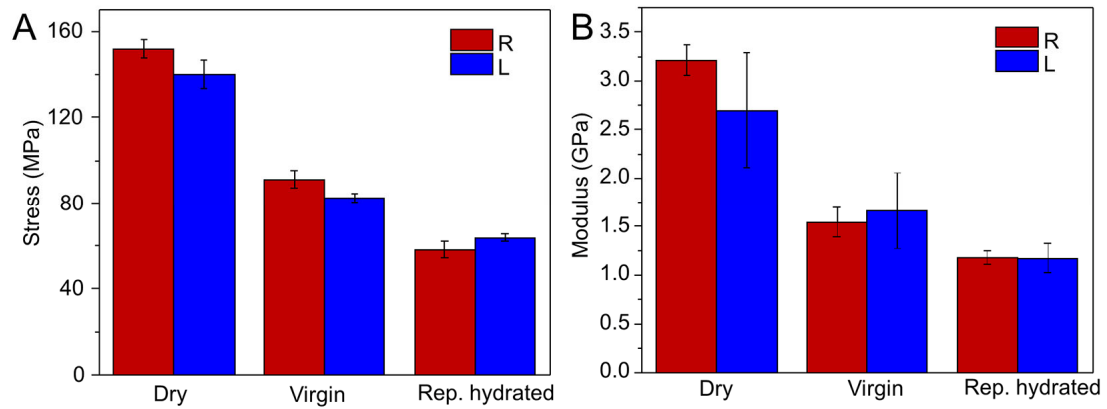

305

306

307

308

309

310

311

**Fig. S19. The ultimate tensile stress and tensile modulus of seed shells in different hydrated states.**

(A) The ultimate tensile stress of seed shells in dry, virgin and repeatedly hydrated (Rep, hydrated) state parallel (R) to and perpendicular (L) to equator direction. (B) Tensile modulus obtained from the stress-strain curves.

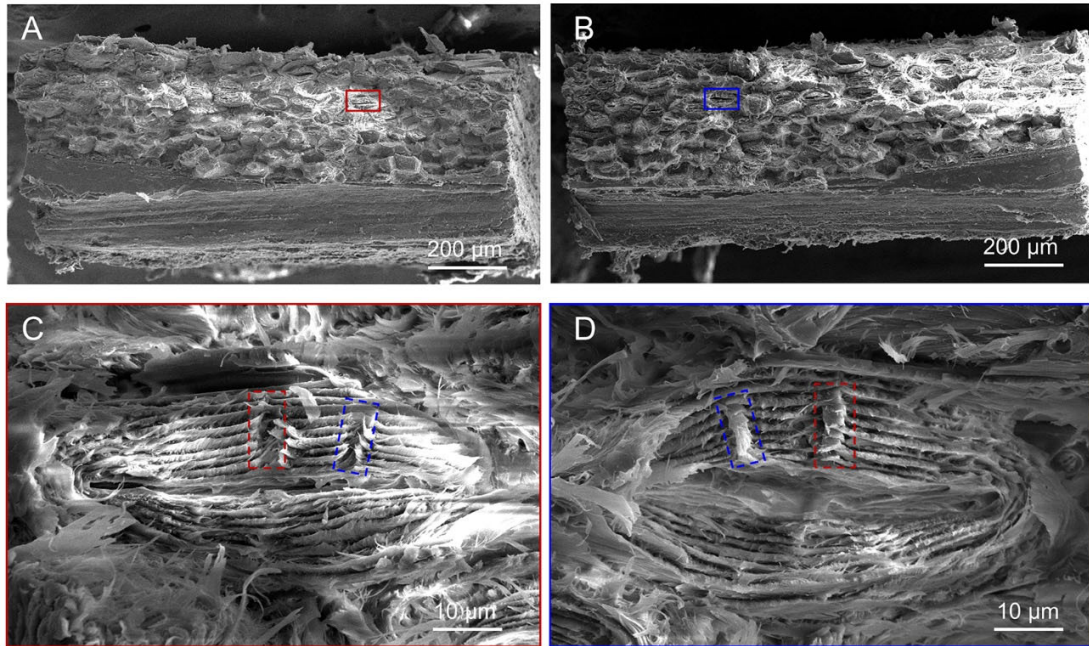

312

313 **Fig. S20. SEM images of the two fractured surfaces from one sample in virgin state.**

314 SEM images of the fractured surface (A) and the opposite fractured surface (B) from a sample in  
315 virgin state. SEM images of pits guiding the fracture through the cells (C) and through broken cells  
316 (D) left behind on the opposite fracture surface. The dashed red and blue areas in (c and d) are  
317 pits divided into two parts.  
318

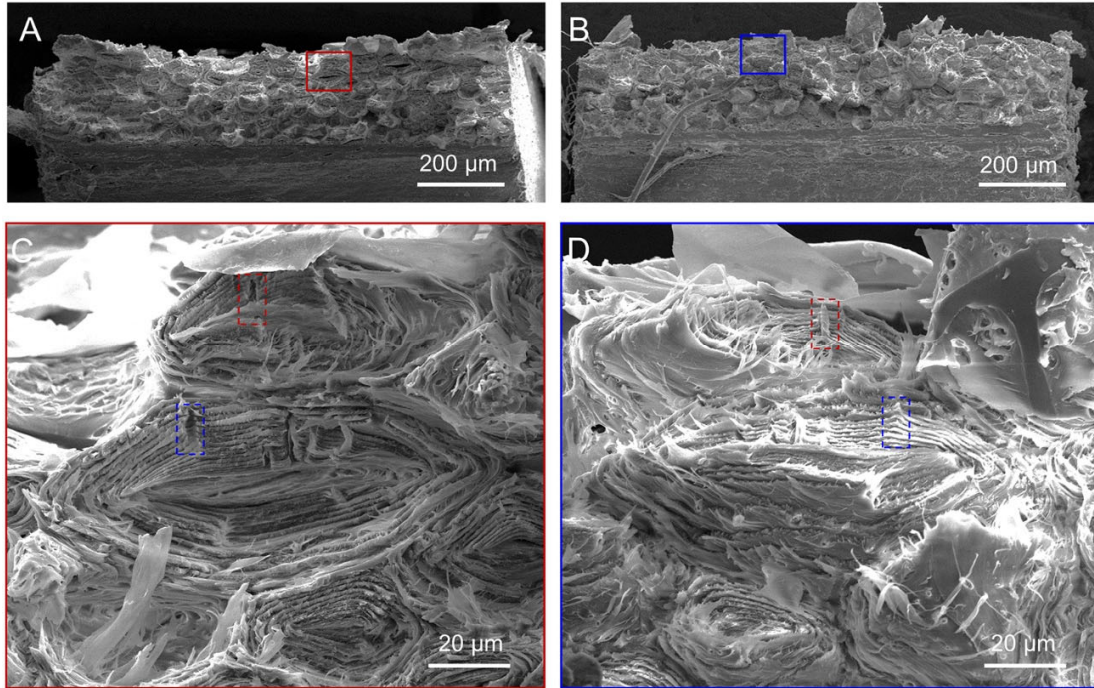

319

320 **Fig. S21. SEM images of the two fractured surfaces from one sample in repeatedly hydrated**  
321 **state.**

322 SEM images of the fractured surface (A) and the opposite fractured surface (B) from a sample in  
323 repeatedly hydrated state. SEM images of pits guiding the fracture through the cells (C) and (D)  
324 the opposite fracture surface. The dashed red and blue areas in (c and d) are pits divided into two  
325 parts.  
326

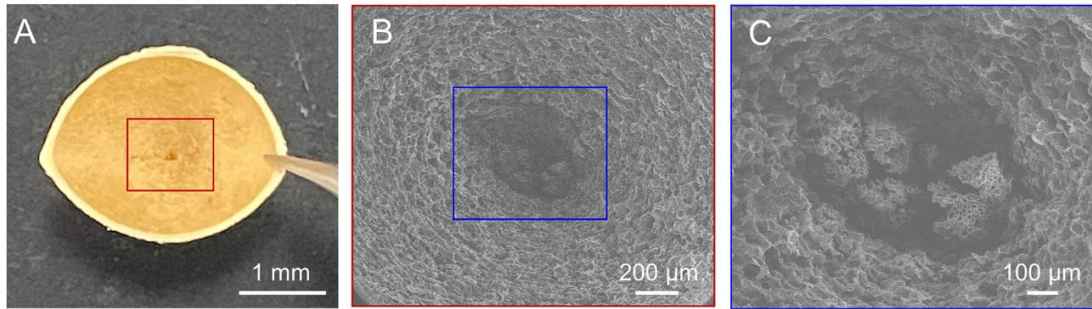

327

328 **Fig. S22. Digital and SEM images of a hole at the end of seed shell.**

329 **(A)** The digital image of one end of the ginkgo seed shell. **(B)** SEM image of a hole at one end of  
330 the shell while it is dormant and **(C)** magnified images of the hole.

331

332 **Table S1. Young's modulus of ginkgo seed shell obtained from the nanoindentation**  
333 **measurements with different water content.**

334 The dry seed shell sample is a piece with a length of 8 mm, width of 5 mm, and thickness of 0.6  
335 mm. After the nanoindentation test, the sample was immersed in deionized water for 30 minutes,  
336 then dried in ambient air for 17, 27, 40, and 60 min, respectively. These samples are designated I,  
337 II, III, and IV. The water content of each sample was measured by thermogravimetric analysis.  
338

| Sample | Young's modulus (GPa) | Water content (%) |
|--------|-----------------------|-------------------|
| Dry    | 10.80                 | 5.64              |
| I      | 3.91                  | 8.19              |
| II     | 6.55                  | 7.44              |
| III    | 6.87                  | 7.10              |
| IV     | 8.96                  | 6.18              |

339  
340

341 **Movie S1.** 3D reconstruction of the sclereids using synchrotron X-ray micro-CT.

342 **Movie S2.** In-situ SEM characterization of the crack entering into a sclereid guided by the pit.

343

344

345

#### 346 **SI References**

347

348 1. C. Chen. Stress intensity factor of three-point bending fracture toughness specimen. *Chin.*

349 *J. Theor. Appl. Mech.* **10**, 121–124 (1974).

350 2. X. D. Li, B. Bhushan. A review of nanoindentation continuous stiffness measurement

351 technique and its applications. *Mater. Character.* **48**, 11-36 (2002).

352 3. J. J. Vlassak, M. Ciavarella, J. R. Barber, X. Wang. The indentation modulus of elastically

353 anisotropic materials for indenters of arbitrary shape. *J. Mech. Phys. Solids* **51**, 1701-1721

354 (2003).

355 4. J. G. Swadener, G. M. Pharr. Indentation of elastically anisotropic half-spaces by cones

356 and parabolae of revolution. *Philos. Mag. A* **81**, 447-466 (2001).

357 5. W. C. Oliver, G. M. Pharr. Measurement of hardness and elastic modulus by instrumented

358 indentation: Advances in understanding and refinements to methodology. *J. Mater. Res.*

359 **19**, 3-20 (2004).

360 6. D. M. Barnett, J. Lothe. Line force loadings on anisotropic half-spaces and wedges. *Phys.*

361 *Norv.* **8**, 13–22 (1975).

362 7. J. R. Barber. Determining the contact area in elastic-indentation problems. *J. Strain Anal.*

363 *Eng. Des.* **9**, 230–232 (1974).

364
